# Supplementary material for: Knowledge and Attitude towards Vaccination among Healthcare Workers: A Multicenter Cross-Sectional Study in a Southern Italian Region
Source: PubMed Central journal article supplement (PMC7350011; doi:10.3390/vaccines8020248), 2020-05-24
Supplement: vaccines-08-00248-s001.pdf [file vaccines-08-00248-s001.pdf]

Table S1. Differences in vaccination coverage by gender

| Gender | DTP       | p-value | HB         | p-value | MPR        | p-value | Flu       | p-value |
|--------|-----------|---------|------------|---------|------------|---------|-----------|---------|
| Female | 79 (29.8) | 0.077   | 243 (91.7) | 0.682   | 111( 41.9) | 0.137   | 76 (28.7) | <0.001  |
| Male   | 33 (40.2) |         | 74 (90.2)  |         | 42 (51.2)  |         | 46 (56.1) |         |

Table S2. Differences in vaccination coverage by age

| Age class | DTP       | p-value | HB         | p-value | MPR       | p-value | Flu       | p-value |
|-----------|-----------|---------|------------|---------|-----------|---------|-----------|---------|
| <30       | 14 (63.6) |         | 22 (100)   |         | 20 (90.9) |         | 9 (40.9)  |         |
| 30-40     | 26 (39.4) |         | 66 (100)   |         | 48 (72.7) |         | 24 (36.4) |         |
| 41-50     | 41 (40.2) | <0.001  | 92 (90.2)  | 0.017   | 51 (50.0) | <0.001  | 26 (25.5) | 0.001   |
| 51-60     | 23 (20.0) |         | 101 (87.8) |         | 27 (23.5) |         | 37 (32.2) |         |
| >60       | 8 (19.0)  |         | 36 (85.7)  |         | 7 (16.7)  |         | 26 (61.9) |         |
